# Supplementary material
Source: PubMed Central journal article supplement (PMC4209919)
Supplement: NIHMS634175-supplement-supplementary_B.pdf [file NIHMS634175-supplement-supplementary_B.pdf]

Supplemental Materials B. Demographic and seizure characteristics for categorical language activation patterns of patients

|                      | Left Dominant          |                |                       |                       | Bilateral            | Crossed Dominant      |                       | Right Dominant       |                      |                      |
|----------------------|------------------------|----------------|-----------------------|-----------------------|----------------------|-----------------------|-----------------------|----------------------|----------------------|----------------------|
|                      | L IFG/ L WA<br>(n=128) | L IFG<br>(n=4) | B IFG/ L WA<br>(n=21) | L IFG/ B WA<br>(n=11) | B IFG/ B WA<br>(n=3) | L IFG/ R WA<br>(n=10) | R IFG/ L WA<br>(n=16) | B IFG/ R WA<br>(n=7) | R IFG/ B WA<br>(n=7) | R IFG/ RWA<br>(n=13) |
| <b>Gender</b>        |                        |                |                       |                       |                      |                       |                       |                      |                      |                      |
| Male                 | 60.2% (n=77)           | 50% (n=2)      | 42.9% (n=9)           | 27.3% (n=3)           | 66.7% (n=2)          | 60% (n=6)             | 50% (n=8)             | 42.9% (n=3)          | 71.4% (n=5)          | 46.2% (n=6)          |
| Female               | 39.8% (n=51)           | 50% (n=2)      | 57.1% (n=12)          | 72.7% (n=8)           | 33.3% (n=1)          | 40% (n=4)             | 50% (n=8)             | 57.1% (n=4)          | 28.6% (n=2)          | 53.8% (n=7)          |
| <b>Mean Age (SD)</b> |                        |                |                       |                       |                      |                       |                       |                      |                      |                      |
|                      | 21.4 (10.9)            | 16.6 (1.4)     | 25.1 (15.1)           | 26.3 (16.0)           | 25.3 (19.1)          | 25.2 (16.0)           | 19.0 (11.8)           | 14.5 (4.1)           | 28.7 (13.3)          | 20.7 (14.4)          |
| <b>Handedness</b>    |                        |                |                       |                       |                      |                       |                       |                      |                      |                      |
| Right                | 86.7% (n=111)          | 50% (n=2)      | 76.2% (n=16)          | 81.8% (n=9)           | 100% (n=3)           | 90% (n=9)             | 62.5% (n=10)          | 85.7% (n=6)          | 57.1% (n=4)          | 38.5% (n=5)          |
| Ambidextrous         | 7.8% (n=10)            | 0%             | 4.8% (n=1)            | 9.1% (n=1)            | 0%                   | 10% (n=1)             | 12.5% (n=2)           | 0%                   | 0%                   | 7.7% (n=1)           |
| Left                 | 5.5% (n=7)             | 50% (n=2)      | 19.0% (n=4)           | 9.1% (n=1)            | 0%                   | 0%                    | 25% (n=4)             | 14.3% (n=1)          | 42.9% (n=3)          | 53.8% (n=7)          |
| <b>Mean IQ (SD)</b>  |                        |                |                       |                       |                      |                       |                       |                      |                      |                      |
|                      | (n=78)                 | (n=2)          | (n=10)                | (n=3)                 | (n=2)                | (n=5)                 | (n=9)                 | (n=4)                | (n=6)                | (n=11)               |
| FSIQ                 | 94 (16)                | 66 (22)        | 86 (11)               | 91 (12)               |                      | 86 (18)               | 92 (16)               | 86 (17)              | 96 (12)              | 95 (16)              |
| VIQ                  | 94 (15)                | 68 (18)        | 86 (12)               | 94 (18)               | 92 (32)              | 84 (9)                | 92 (12)               | 95 (16)              | 95 (14)              | 96 (13)              |
| PIQ                  | 95 (17)                | 78 (10)        | 64 (13)               | 80 (6)                | 94 (55)              | 101 (23)              | 99 (19)               | 81 (10)              | 97 (11)              | 92 (13)              |
| <b>Age of onset</b>  |                        |                |                       |                       |                      |                       |                       |                      |                      |                      |
| Early                | 27.3% (n=35)           | 50% (n=2)      | 26.3% (n=5)           | 9.1% (n=1)            | 0%                   | 80% (n=8)             | 26.7% (n=4)           | 28.6% (n=2)          | 42.9% (n=3)          | 61.5% (n=8)          |
| Late                 | 72.7% (n=93)           | 50% (n=2)      | 73.7% (n=14)          | 90.9% (n=10)          | 100% (n=3)           | 20% (n=2)             | 73.3% (n=11)          | 71.4% (n=5)          | 57.1% (n=4)          | 38.5% (n=5)          |
| Mean (SD)            | 11.7 (8.7)             | 6.6 (4.9)      | 15.4 (10.1)           | 15.1 (11.9)           | 17.8 (11.4)          | 5.3 (5.6)             | 12.4 (9.7)            | 8.3 (3.4)            | 14.1 (12.1)          | 9.7 (11.1)           |
| <b>Focus</b>         |                        |                |                       |                       |                      |                       |                       |                      |                      |                      |
| LT                   | 41.4% (n=53)           | 25% (n=1)      | 52.4% (n=11)          | 18.2% (n=2)           | 66.7% (n=2)          | 20% (n=2)             | 37.5% (n=6)           | 28.6% (n=2)          | 14.3% (n=1)          | 53.8% (n=7)          |
| RT                   | 21.1% (n=27)           | 50% (n=2)      | 14.3% (n=3)           | 9.1% (n=1)            | 33.3% (n=1)          | 30% (n=3)             | 18.8% (n=3)           | 14.3% (n=1)          | 14.3% (n=1)          | 15.4% (n=2)          |
| LF                   | 15.6% (n=20)           | 0%             | 9.5% (n=2)            | 9.1% (n=1)            | 0%                   | 20% (n=2)             | 12.5% (n=2)           | 14.3% (n=1)          | 0%                   | 0%                   |
| LP                   | 3.1% (n=4)             | 0%             | 4.8% (n=1)            | 0%                    | 0%                   | 0%                    | 6.3% (n=1)            | 0%                   | 14.3% (n=1)          | 0%                   |
| LO                   | 0.8% (n=1)             | 0%             | 0%                    | 0%                    | 0%                   | 0%                    | 0%                    | 0%                   | 0%                   | 0%                   |
| RF                   | 0%                     | 0%             | 0%                    | 0%                    | 0%                   | 0%                    | 0%                    | 0%                   | 0%                   | 0%                   |
| RP                   | 1.6% (n=2)             | 0%             | 0%                    | 18.2% (n=2)           | 0%                   | 0%                    | 0%                    | 14.3% (n=1)          | 14.3% (n=1)          | 7.7% (n=1)           |
| RO                   | 0%                     | 0%             | 0%                    | 9.1% (n=1)            | 0%                   | 10% (n=1)             | 6.3% (n=1)            | 0%                   | 0%                   | 0%                   |
| Multiple             | 8.6% (n=11)            | 25% (n=1)      | 0%                    | 18.2% (n=2)           | 0%                   | 10% (n=1)             | 6.3% (n=1)            | 14.3% (n=1)          | 14.3% (n=1)          | 7.7% (n=1)           |
| Missing              | 7.8% (n=10)            | 0%             | 19.0% (n=4)           | 18.2% (n=2)           | 0%                   | 10% (n=1)             | 12.5% (n=2)           | 14.3% (n=1)          | 28.6% (n=2)          | 15.4% (n=2)          |
| <b>MRI Type</b>      |                        |                |                       |                       |                      |                       |                       |                      |                      |                      |
| Normal               | 35.9% (n=46)           | 25% (n=1)      | 28.6% (n=6)           | 9.1% (n=1)            | 66.7% (n=2)          | 10% (n=1)             | 25% (n=4)             | 0%                   | 14.3% (n=1)          | 30.8% (n=4)          |
| MTS                  | 22.7% (n=29)           | 0%             | 14.3% (n=3)           | 9.1% (n=1)            | 0%                   | 20% (n=2)             | 12.5% (n=2)           | 28.6% (n=2)          | 14.3% (n=1)          | 23.1% (n=3)          |
| Lesion               | 32.8% (n=42)           | 25% (n=1)      | 42.9% (n=9)           | 45.5% (n=5)           | 0%                   | 40% (n=4)             | 31.3% (n=5)           | 42.9% (n=3)          | 28.6% (n=2)          | 15.4% (n=2)          |
| Vascular             | 3.1% (n=4)             | 25% (n=1)      | 14.3% (n=3)           | 18.2% (n=2)           | 0%                   | 20% (n=2)             | 18.8% (n=3)           | 14.3% (n=1)          | 28.6% (n=2)          | 30.8% (n=4)          |
| Inflammatory         | 1.6% (n=2)             | 25% (n=1)      | 0%                    | 9.1% (n=1)            | 0%                   | 0%                    | 0%                    | 0%                   | 0%                   | 0%                   |
| Other                | 2.3% (n=3)             | 0%             | 0%                    | 9.1% (n=1)            | 33.3% (n=1)          | 10% (n=1)             | 0%                    | 14.3% (n=1)          | 0%                   | 0%                   |
| Dual Pathology       | 1.6% (n=2)             | 0%             | 0%                    | 0%                    | 0%                   | 0%                    | 12.5% (n=2)           | 0%                   | 0%                   | 0%                   |
| Missing              | 0%                     | 0%             | 0%                    | 0%                    | 0%                   | 0%                    | 0%                    | 0%                   | 14.3% (n=1)          | 0%                   |
